# Supplementary material
Source: PubMed Central journal article supplement (PMC8132299)
Supplement: NIHMS1696171-supplement-Supple_appendix.pdf [file NIHMS1696171-supplement-Supple_appendix.pdf]

## **Appendix**

Page 2: **Epidemiology and patients included per center.**

Page 3: **Pathology at first thyroidectomy in patients with thyroidectomy after 12 months old.** TNM classification based on AJCC 7<sup>th</sup> edition. Structural and biochemical remission was defined by normal calcitonin and carcinoembryonic antigen (CEA) levels and no residual disease on imaging; persistent disease was defined by increased calcitonin and/or CAE with no residual disease on imaging and/or pathological cervical lymph nodes on imaging and/or systemic metastases.

Page 4 : **Previous studies reporting patients included in this series (data were updated in comparison with the original study)**

## Patients' Center

Geographical origin was Europe in 172 (49.9%), North America in 78 (22.6%), South America in 48 (13.9%) and Asia/Oceania in 47 (13.6%). More in detail, the list of Centers was as follows

- Less than 5 patients included: Endocrinology, Lisbon (Portugal); Hospital italiano (Buenos Aires, Argentina); DIMED, Padua (Italy); Endocrinology Unit, Florence (Italy); Hospices civils Lyon (France); Aix-Marseille University (France); Endocrinology, Angers (France); Endocrinology, Nancy (France); Endocrinology Milan (Italy); Endocrinology, Rome (Italy); Endocrinology, Bruxelles (Belgium); Endocrinology, Toulouse (France); Pediatrics, Zagreb (Croatia); Nephrology, Freiburg (Germany); Endocrinology, Montreal (Canada); Endocrinology, Lille (France)
- 5-10 patients included: Endocrinology, Budapest (Hungary); Universidad de Chile (Chile); India; Endocrinology, Nantes (France); Endocrine Oncology Division, São Paulo (Brazil); Universidade Federal do Rio Grande do Sul (Brazil); ORL Head and neck surgery, Copenhagen (Denmark); Institute of Sanitary Research of Asturias (Spain);
- 10-20 patients included: Centro de Investigaciones Endocrinológicas (Argentina), Department of Oncologic and Urologic Surgery (Hangzhou, China), department of endocrinology of Pisa (Italy), University of Michigan (USA), NIH (Bethesda, USA)
- 20-30 patients included: Institut Gustave Roussy (France), Department of Molecular Endocrinology (Czech republic), Department of Nuclear Medicine and Endocrine Oncology Gliwice (Poland), Japan (3 Centers),
- > 30 patients included: Martin Luther University and University Essen (Germany), MD Anderson Cancer Center (Texas, USA)

**Pathology at first thyroidectomy in patients with thyroidectomy after 12 months old.**

|                                             | Available TNM data | T1         | T2         | T3         | T4         | N0         | N1          | M0          | M1         |
|---------------------------------------------|--------------------|------------|------------|------------|------------|------------|-------------|-------------|------------|
| Biochemical and structural remission (n=47) | 34 (72.3%)         | 23 (67.6%) | 9 (26.5%)  | 1 (2.9%)   | 1 (2.9%)   | 18 (52.9%) | 16 (47.1%)  | 34 (100%)   | 0          |
| Persistent disease (n=207)                  | 157 (76%)          | 51 (32.5%) | 43 (27.4%) | 49 (31.2%) | 17 (10.8%) | 20 (12.7%) | 137 (87.3%) | 133 (84.7%) | 24 (15.3%) |
| Deceased of MTC (n=48)                      | 31 (64.5%)         | 8 (25.8%)  | 7 (22.6%)  | 6 (19.4%)  | 10 (32.2%) | 2 (6.5%)   | 29 (93.5%)  | 17 (54.8%)  | 14 (45.2%) |

TNM classification based on AJCC 7<sup>th</sup> edition. Structural and biochemical remission was defined by normal calcitonin and carcinoembryonic antigen (CEA) levels and no residual disease on imaging; persistent disease was defined by increased calcitonin and/or CAE with no residual disease on imaging and/or pathological cervical lymph nodes on imaging and/or systemic metastases.

**Previous studies reporting patients included in this series (data were updated in comparison with the original study)**

| <b>First Author/year</b> | <b>Journal</b>          | <b>Number of patients included in our study</b> | <b>Remark</b>                 |
|--------------------------|-------------------------|-------------------------------------------------|-------------------------------|
| <i>Castinetti/2014</i>   | Lancet Oncology         | 29                                              | No precise data on MTC        |
| <i>Makri/2018</i>        | J Clin Endocrinol Metab | 10                                              | No precise data on MTC        |
| <i>Raue/2018</i>         | J Clin Endocrinol Metab | 38                                              | No precise data on management |
| <i>Mathiesen/2017</i>    | Endocr related Cancer   | 7                                               | No precise data on management |
| <i>Imai/2013</i>         | Eur J Endocrinology     | 13                                              | No precise data on MTC        |
| <i>Leboulleux/2002</i>   | Cancer                  | 18                                              |                               |
